# Supplementary material for: Different pollinator sampling methods measure distinct pollinator communities in a mass-flowering crop, which respond differently to the composition of the surrounding landscape
Source: Copernicus journal article supplement (doi:10.5194/we-25-47-2025), 2025-03-21
Supplement: Supplementary file 1 [file we-25-47-2025-supplement.zip]

Active and passive pollinator sampling determines different pollinator communities in fruit orchards which respond differently to the composition of the surrounding landscape

Maxime Eeraerts and Ivan Meeus

Contact: maxime.eeraerts@gmail.com

## Supplementary materials

**Table S1: Overview of the different pollinator species identified in by means of pan traps and insect nets in 10 sweet cherry orchards in Flanders, Belgium. Because of the difficulty of distinguishing the species *Bombus terrestris*, *B. lucorum*, *B. magnus* and *B. cryptarum* these species were pooled and noted as *B. terrestris* agg.**

| Pollinator group | Pollinator species               | Pan trap  | Insec nets |
|------------------|----------------------------------|-----------|------------|
| Honeybees        | <i>Apis mellifera</i>            | 29        | 519        |
| Bumblebees       | <i>Bombus hortorum</i>           | 0         | 1          |
|                  | <i>Bombus lapidarius</i>         | 0         | 16         |
|                  | <i>Bombus pascuorum</i>          | 0         | 1          |
|                  | <i>Bombus terrestris</i>         | 1         | 33         |
|                  | <i>Bombus pratorum</i>           | 1         | 4          |
| Solitary bees    | <i>Andrena bicolor</i>           | 4         | 3          |
|                  | <i>Andrena carantonica</i>       | 0         | 5          |
|                  | <i>Andrena clarkella</i>         | 2         | 0          |
|                  | <i>Andrena dorsata</i>           | 6         | 1          |
|                  | <i>Andrena flavipes</i>          | 10        | 2          |
|                  | <i>Andrena fulva</i>             | 0         | 4          |
|                  | <i>Andrena_haemorrhoea</i>       | 26        | 4          |
|                  | <i>Andrena helvola</i>           | 0         | 1          |
|                  | <i>Andrena minulata</i>          | 4         | 1          |
|                  | <i>Andrena spp.</i>              | 1         | 0          |
|                  | <i>Chelostoma florisomne</i>     | 1         | 0          |
|                  | <i>Halictus rubicindus</i>       | 2         | 0          |
|                  | <i>Lasioglossum calceatum</i>    | 4         | 3          |
|                  | <i>Lasioglossum malachurum</i>   | 6         | 0          |
|                  | <i>Lasioglossum spp</i>          | 13        | 0          |
|                  | <i>Osmia bicornis</i>            | 0         | 2          |
|                  | <i>Osmia cornuta</i>             | 2         | 3          |
| Hoverflies       | <i>Eristalis pertinax</i>        | 7         | 12         |
|                  | <i>Eristalis tenax</i>           | 2         | 6          |
|                  | <i>Eristalis arbustorum</i>      | 2         | 1          |
|                  | <i>Pyrophaena rosarum</i>        | 1         | 0          |
|                  | <i>Eupeodes luniger</i>          | 0         | 1          |
|                  | <i>Portevinia maculata</i>       | 0         | 1          |
|                  | <i>Rhingia campestris</i>        | 0         | 2          |
|                  | <b>Total species</b>             | <b>20</b> | <b>23</b>  |
|                  | <b>Unique species per method</b> | <b>7</b>  | <b>10</b>  |

Active and passive pollinator sampling determines different pollinator communities in fruit orchards which respond differently to the composition of the surrounding landscape

Maxime Eeraerts and Ivan Meeus

Contact: maxime.eeraerts@gmail.com

**Fig S1: Sample-based species accumulation curve of the number pollinator species identified in by means of insect nets (A) and pan traps (B) in 10 sweet cherry orchards in Flanders, Belgium. Grey area around the species accumulation curve indicates the 95% confidence interval.**

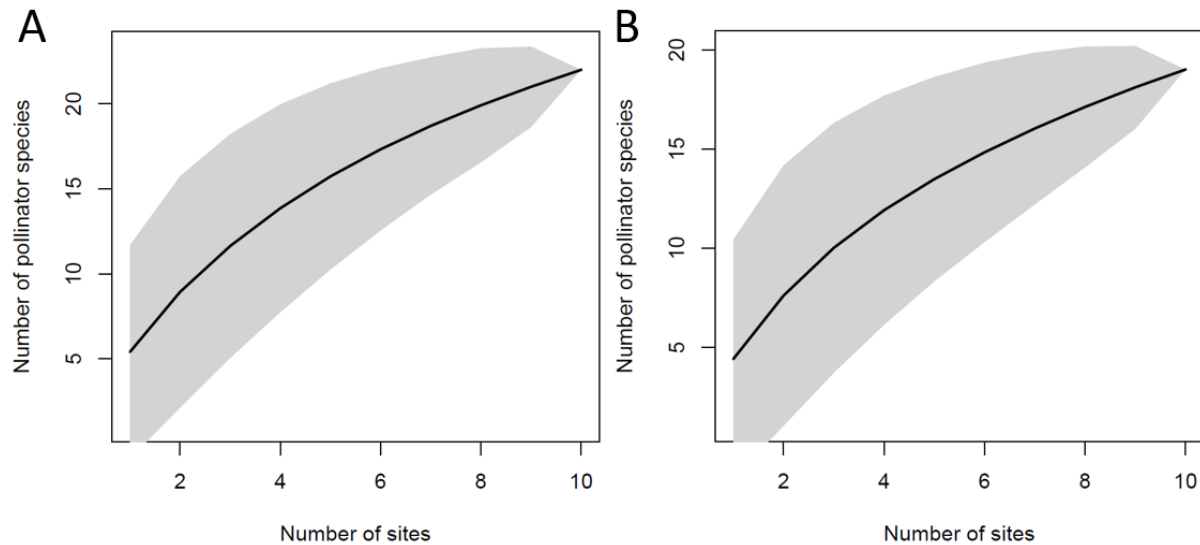

**Table S2: Model ranking of the full models at the different landscape scales per landscape scale (250 m and 1000 m; including a null model as well) for total pollinator species richness, total wild pollinator abundance and honeybee abundance.  $\Delta AICc$  is the difference between the AICc of the model with the lowest AICc and the AICc of the models per response variable.**

| Response variable                 | Landscape scale | AICc          | dAICc       |
|-----------------------------------|-----------------|---------------|-------------|
| Total pollinator species richness | Null            | 128.64        | 33.18       |
|                                   | 250 m           | 104.76        | 9.30        |
|                                   | 1000 m          | <b>95.46</b>  | <b>0.00</b> |
| Total wild pollinator abundance   | Null            | 153.82        | 19.46       |
|                                   | 250 m           | 141.58        | 7.22        |
|                                   | 1000 m          | <b>134.36</b> | <b>0.00</b> |

**Table S3: Raw data of the study.**
