# Supplementary material for: Different pollinator sampling methods measure distinct pollinator communities in a mass-flowering crop, which respond differently to the composition of the surrounding landscape
Source: Copernicus journal article supplement (doi:10.5194/we-25-47-2025), 2025-03-21
Supplement: Supplementary file 1 [file we-25-47-2025-supplement.zip]

## Sheet: Sheet1
Location	Method	SNH250	SNH1000	IFC250	IFC1000	Apis.mellifera	Bombus.hortorum	Bombus.lapidarius	Bombus.pascuorum	Bombus.terrestris	Bombus.pratorum	Andrena.bicolor	Andrena.carantonica	Andrena.clarkella	Andrena.dorsata	Andrena.flavipes	Andrena.fulva	Andrena_haemorrhoa	Andrena.helvola	Andrena.minulata	Andrena.spp	Chelostoma.florisomne	Halictus.rubicindus	Lasioglossum.calceatum	Lasioglossum.malachurum	Lasioglossum.spp	Osmia.bicornis	Osmia.cornuta	Eristalis.pertinax	Eristalis.tenax	Eristalis.arbustorum	Pyrophaena rosarum	Eupeodes.luniger	Portevinia.maculata	Rhingia.campestris
C01	Pan trap	41.4	27	38.4	18.6	12	0	0	0	1	0	0	0	0	1	2	0	4	0	1	0	0	0	0	5	0	0	0	4	2	0	0	0	0	0
C02	Pan trap	0.6	5.2	48.6	18.9	11	0	0	0	0	0	2	0	1	0	4	0	1	0	0	0	0	0	0	0	0	0	2	0	0	0	0	0	0	0
C03	Pan trap	29	20.4	14.4	19.3	0	0	0	0	0	0	0	0	0	0	1	0	12	0	1	0	0	0	0	1	0	0	0	1	0	0	0	0	0	0
C04	Pan trap	0.4	3.9	20	16	1	0	0	0	0	0	0	0	0	0	1	0	0	0	0	0	0	0	0	0	0	0	0	0	0	0	0	0	0	0
C05	Pan trap	28.1	26.3	38.4	18.6	0	0	0	0	0	1	0	0	0	2	0	0	4	0	1	0	0	0	0	0	8	0	0	1	0	2	0	0	0	0
C06	Pan trap	7.5	12.3	21.1	20.4	1	0	0	0	0	0	0	0	0	0	0	0	2	0	0	0	0	0	0	0	0	0	0	1	0	0	1	0	0	0
C07	Pan trap	9.1	10.4	25.7	22	0	0	0	0	0	0	2	0	0	3	2	0	3	0	1	1	1	2	2	0	1	0	0	0	0	0	0	0	0	0
C08	Pan trap	2.3	4.6	15.2	18.9	1	0	0	0	0	0	0	0	1	0	0	0	0	0	0	0	0	0	2	0	2	0	0	0	0	0	0	0	0	0
C09	Pan trap	38	29.4	7.6	7.8	1	0	0	0	0	0	0	0	0	0	0	0	0	0	0	0	0	0	0	0	1	0	0	0	0	0	0	0	0	0
C10	Pan trap	1.1	6.5	5.8	9.8	2	0	0	0	0	0	0	0	0	0	0	0	0	0	0	0	0	0	0	0	1	0	0	0	0	0	0	0	0	0
C01	Nets	41.4	27	38.4	18.6	37	0	1	0	3	1	0	0	0	0	0	1	1	0	0	0	0	0	0	0	0	0	1	1	0	0	0	0	1	0
C02	Nets	0.6	5.2	48.6	18.9	105	1	0	0	1	0	0	0	0	0	0	0	0	0	0	0	0	0	0	0	0	0	0	0	0	0	0	1	0	0
C03	Nets	29	20.4	14.4	19.3	27	0	3	1	11	0	1	0	0	0	0	2	3	0	0	0	0	0	0	0	0	1	0	2	3	0	0	0	0	0
C04	Nets	0.4	3.9	20	16	105	0	1	0	4	0	0	0	0	0	0	0	0	0	0	0	0	0	0	0	0	0	0	0	0	0	0	0	0	0
C05	Nets	28.1	26.3	38.4	18.6	34	0	3	0	2	0	2	0	0	1	2	0	0	0	0	0	0	0	0	0	0	0	0	8	1	1	0	0	0	2
C06	Nets	7.5	12.3	21.1	20.4	68	0	1	0	3	0	0	0	0	0	0	0	0	0	0	0	0	0	0	0	0	0	1	0	0	0	0	0	0	0
C07	Nets	9.1	10.4	25.7	22	26	0	3	0	5	0	0	3	0	0	0	0	0	0	1	0	0	0	0	0	0	0	0	0	1	0	0	0	0	0
C08	Nets	2.3	4.6	15.2	18.9	30	0	0	0	0	1	0	1	0	0	0	0	0	0	0	0	0	0	1	0	0	0	0	0	1	0	0	0	0	0
C09	Nets	38	29.4	7.6	7.8	36	0	2	0	4	2	0	1	0	0	0	1	0	1	0	0	0	0	2	0	0	1	1	1	0	0	0	0	0	0
C10	Nets	1.1	6.5	5.8	9.8	51	0	2	0	0	0	0	0	0	0	0	0	0	0	0	0	0	0	0	0	0	0	0	0	0	0	0	0	0	0

## Sheet: ReadME
Variable
Location	Location ID of sampling sites
Method	Polliantor sampling method, passive sampling by means of pan traps or active sampling by means of insect nets
SNH250	percentage of semi-natural habitat within a buffer zone of 250 m
SNH1000	percentage of semi-natural habitat within a buffer zone of 1000 m
IFC250	percentage of intensive fruit cultivation within a buffer zone of 250 m
IFC1000	percentage of intensive fruit cultivation within a buffer zone of 1000 m
Remaining columns are bee and hoverfly species and their abundance per site and per sampling method
