# Supplementary material for: Different pollinator sampling methods measure distinct pollinator communities in a mass-flowering crop, which respond differently to the composition of the surrounding landscape
Source: Copernicus journal article supplement (doi:10.5194/we-25-47-2025), 2025-03-21
Supplement: Supplementary file 2 [file we-25-47-2025-supplement.zip]

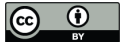

## *Supplement of*

# **Different pollinator sampling methods measure distinct pollinator communities in a mass-flowering crop, which respond differently to the composition of the surrounding landscape**

**Maxime Eeraerts and Ivan Meeus**

*Correspondence to:* Maxime Eeraerts ([maxime.eeraerts@gmail.com](mailto:maxime.eeraerts@gmail.com))

- [we-25-47-2025-supplement-title-page.pdf](#)
- [Eeraerts\\_Meeus\\_Cherry16.R](#)
- [Eeraerts\\_Meeus\\_Cherry16\\_TableS3.xlsx](#)
- [Eeraerts\\_Meeus\\_Cherry16\\_supplementary.pdf](#)

The copyright of individual parts of the supplement might differ from the article licence.
